# Supplementary material for: Metabolism and Health Effects of Rare Sugars in a CACO-2/HepG2 Coculture Model
Source: MDPI journal article supplement (doi:10.3390/nu14030611), 2022-01-30
Supplement: s1 [file s1]

Mitochondrial & DNA damage

Inflammation

Diabetes, glucose homeostasis and insulin resistance

Diabetes pathology

Lipid metabolism

Table S1a

| Genes           | Glucose | Fructose | L-arabinose |
|-----------------|---------|----------|-------------|
| TXNIP           | 16.8    | 2.71     |             |
| WFDC2           | 7.06    |          |             |
| ARRDC4          | 5.50    |          |             |
| AADACP1         | 3.86    |          |             |
| TNNI3           | 3.43    |          |             |
| SLC28A1         | 3.43    |          |             |
| ZNF441          | 3.41    |          |             |
| DOK1            | 2.87    |          |             |
| UGT2B10         | 2.83    |          |             |
| MAGEH1          | 2.83    |          |             |
| TMEM229B        | 2.83    |          |             |
| EXOC3L4         | 2.77    |          |             |
| CRYM            | 2.75    |          |             |
| AP001059.1      | 2.69    |          |             |
| OSBP2           | 2.62    |          |             |
| ZNF100          | 2.51    |          |             |
| FZD4            | 2.41    |          |             |
| TNNT1           | 2.38    |          |             |
| TFF3            | 2.36    |          |             |
| COL2A1          | 2.22    |          |             |
| GPCPD1          | 2.17    |          |             |
| TRIM59          | 2.17    |          |             |
| KBTBD7          | 2.16    |          |             |
| SLC25A47        | 2.16    |          |             |
| ENSG00000273361 | 2.14    |          |             |
| AGPAT2          | 2.14    |          |             |
| MEGF8           | 2.04    |          |             |
| BRI3BP          | 2.04    |          |             |
| FBXL16          | 2.03    |          |             |
| AC132872.1      | 2.01    |          |             |
| CDKN2C          | 2       |          |             |
| RPS10-NUDT3     | 18.5    |          |             |
| FOS             | 9.32    |          |             |
| WNT7B           | 6.63    |          |             |
| SOX7            | 5.31    |          |             |

|            |      |  |      |
|------------|------|--|------|
| BHLHE40    | 4.89 |  | 2.33 |
| ACTA1      | 4.82 |  |      |
| PLCXD3     | 4.69 |  |      |
| SCHIP1     | 4.66 |  |      |
| NGFR       | 4.56 |  |      |
| DUSP5      | 4.50 |  | 2.14 |
| GNAI1      | 4.29 |  |      |
| EGR1       | 3.73 |  |      |
| JDP2       | 3.66 |  |      |
| NUAK1      | 3.51 |  |      |
| AC026202.2 | 3.51 |  |      |
| IL11       | 3.39 |  |      |
| GPRC5A     | 3.34 |  |      |
| HSPA1B     | 3.10 |  |      |
| AKR1B10    | 2.97 |  |      |
| CCN1       | 2.91 |  |      |
| FAM110C    | 2.91 |  | 2.57 |
| MISP       | 2.69 |  |      |
| ANXA3      | 2.66 |  |      |
| ITPRIP     | 2.62 |  |      |
| DNAJB4     | 2.62 |  |      |
| LYVE1      | 2.60 |  |      |
| METRNL     | 2.55 |  |      |
| NUPR1      | 2.55 |  |      |
| PALLD      | 2.53 |  |      |
| KLF5       | 2.50 |  |      |
| UBASH3B    | 2.46 |  |      |
| HERPUD1    | 2.41 |  |      |
| DUSP1      | 2.39 |  |      |
| FGD6       | 2.39 |  |      |
| DDIT4      | 2.38 |  | 2.31 |
| MAFF       | 2.38 |  |      |
| EPHA2      | 2.36 |  |      |
| ADM        | 2.35 |  | 2.66 |
| CITED2     | 2.35 |  | 2.04 |
| PPP1R15A   | 2.28 |  |      |
| GRB10      | 2.25 |  |      |
| SPRY4      | 2.25 |  |      |
| DNAJB1     | 2.25 |  |      |
| ATG14      | 2.23 |  |      |
| DNAJB9     | 2.19 |  |      |
| IER3       | 2.17 |  |      |
| MXD1       | 2.17 |  |      |
| FBLIM1     | 2.14 |  |      |
| TANC1      | 2.13 |  |      |

|                 |      |      |      |
|-----------------|------|------|------|
| STK26           | 2.08 |      |      |
| CDR2L           | 2.08 |      |      |
| C9orf152        | 2.08 |      |      |
| ARHGEF2         | 2.07 |      |      |
| SOCS5           | 2.07 |      |      |
| GDF15           | 2.04 |      |      |
| SLC4A11         | 2.03 |      |      |
| KDM7A           | 2.03 |      |      |
| RASD1           | 2    |      |      |
| ANGPTL4         |      | 2.77 | 3.41 |
| TCIRG1          |      | 2.62 |      |
| RTN4R           |      | 2.30 |      |
| AL391416.1      |      | 4.63 |      |
| GAPDHP35        |      | 4.06 | 3.41 |
| ASNS            |      | 2.85 |      |
| SLC7A11         |      | 2.48 |      |
| ADM2            |      | 2.35 |      |
| SLC6A9          |      | 2.14 |      |
| SIK1B           |      |      | 2.93 |
| ERRFI1          |      |      | 2.62 |
| ZNF628          |      |      | 2.60 |
| HAMP            |      |      | 2.57 |
| HILPDA          |      |      | 2.36 |
| ENSG00000125968 |      |      | 2.28 |
| TNS4            |      |      | 2.25 |
| INHBB           |      |      | 2.22 |
| PFKFB3          |      |      | 2.17 |
| RN7SL1          |      |      | 2.16 |
| KCNG3           |      |      | 2.14 |
| RPS15P4         |      |      | 2.08 |
| A4GALT          |      |      | 2.08 |
| KLF10           |      |      | 2.08 |
| ARRDC3          |      |      | 2.08 |
| ANKRD37         |      |      | 2.08 |
| ELF3            |      |      | 2.06 |
| LIN54           |      |      | 2.01 |
| RIT1            |      |      | 2.01 |
| FAM86EP         |      |      | 3.34 |
| SRGAP3          |      |      | 3.07 |
| NEXN            |      |      | 2.69 |
| BISPR           |      |      | 2.43 |
| AL035461.2      |      |      | 2.31 |
| AC022075.1      |      |      | 2.28 |

S1b

| Genes  | Glucose<br>vs<br>Fructose | Glucose<br>vs<br>Mannitol | Fructose<br>vs<br>Mannitol |
|--------|---------------------------|---------------------------|----------------------------|
| TXNIP  | 6.19                      | 16.8                      | 2.71                       |
| WNT7B  | 5.31                      | 6.63                      |                            |
| EGR1   | 2.97                      | 3.73                      |                            |
| DDIT4  | 2.69                      | 2.38                      |                            |
| FOSL2  | 2.32                      |                           |                            |
| FBLIM1 | 2.11                      | 2.14                      |                            |

S1c

| Genes    | Fructose<br>vs<br>L-Arabinose | Fructose<br>vs<br>Mannitol | L-arabinose<br>vs<br>Mannitol |
|----------|-------------------------------|----------------------------|-------------------------------|
| NBPF8    | 4.66                          |                            |                               |
| FOS      | 3.01                          |                            |                               |
| BHLHE40  | 2.77                          |                            | 2.33                          |
| DUSP1    | 2.48                          |                            |                               |
| ERRFI1   | 2.23                          |                            | 2.62                          |
| PPP1R15A | 2.22                          |                            |                               |
| RASD1    | 2.10                          |                            |                               |
| DDIT4    | 2.03                          |                            | 2.31                          |
| RSRC2    | 2.01                          |                            |                               |
| TIPARP   | 2                             |                            |                               |

S1d

| Genes          | Glucose<br>vs<br>L-arabinose | Glucose<br>vs<br>Mannitol | L-arabinose<br>vs<br>Mannitol |
|----------------|------------------------------|---------------------------|-------------------------------|
| RPS10-NUDT3    | 25.8                         | 18.5                      |                               |
| FOS            | 16.7                         | 9.32                      |                               |
| TXNIP          | 14.7                         | 16.8                      |                               |
| EGR4           | 11.8                         |                           |                               |
| BHLHE40        | 11.4                         | 4.89                      | 2.33                          |
| DUSP5          | 9.71                         | 4.50                      | 2.14                          |
| RN7SK          | 9.71                         |                           |                               |
| ACTA1          | 8.75                         | 4.82                      |                               |
| RPL17-C18orf32 | 8.28                         |                           |                               |
| FAM110C        | 7.36                         | 2.91                      | 2.57                          |
| DLX3           | 7.36                         |                           |                               |
| AHHR           | 7.06                         |                           |                               |
| PFKFB3         | 7.01                         |                           | 2.17                          |
| SIK1B          | 6.96                         |                           | 2.93                          |

|                 |      |      |      |
|-----------------|------|------|------|
| AC013394.1      | 6.45 |      |      |
| SOX7            | 6.32 | 5.31 |      |
| ADM             | 6.28 | 2.35 | 2.66 |
| SLC01B3         | 5.94 |      |      |
| UGT2B11         | 5.74 |      |      |
| DDIT4           | 5.58 | 2.38 | 2.31 |
| RPS26P19        | 5.58 |      |      |
| EGR1            | 5.39 | 3.73 |      |
| GNAI1           | 5.28 | 4.29 |      |
| ENSG00000260788 | 5.21 |      |      |
| ENSG00000224945 | 5.17 |      |      |
| BANCR           | 5.10 |      |      |
| SLC28A1         | 5.03 | 3.43 |      |
| ENSG00000263244 | 4.96 |      |      |
| CITED2          | 4.82 | 2.35 | 2.04 |
| AL360012.1      | 4.79 |      |      |
| SCHIP1          | 4.66 | 4.66 |      |
| CCN1            | 4.59 | 2.91 |      |
| PPP1R15A        | 4.50 | 2.28 |      |
| DUSP1           | 4.50 | 2.39 |      |
| CYP1A1          | 4.47 |      |      |
| NGFR            | 4.35 | 4.56 |      |
| KLF5            | 4.32 | 2.50 |      |
| SOCS3           | 4.32 |      |      |
| GPRC5A          | 4.29 | 3.34 |      |
| ACSBG1          | 4.23 |      |      |
| ENSG00000251867 | 4.14 |      |      |
| DUSP4           | 4.06 |      |      |
| LRRC25          | 4    |      |      |
| DUXAP9          | 3.94 |      |      |
| PSME2P2         | 3.92 |      |      |
| ZFP36           | 3.89 |      |      |
| FRY-AS1         | 3.86 |      |      |
| TNS4            | 3.86 |      | 2.25 |
| NOCT            | 3.86 |      |      |
| ATOH8           | 3.84 |      |      |
| FOSL2           | 3.76 |      |      |
| ANXA3           | 3.76 | 2.66 |      |
| ANKRD37         | 3.76 |      | 2.08 |
| F2RL1           | 3.73 |      |      |
| ACSM2A          | 3.73 |      |      |
| TPM3P9          | 3.71 |      |      |
| ELF3            | 3.71 |      | 2.06 |
| MAFF            | 3.71 | 2.38 |      |
| ALDH3A1         | 3.63 |      |      |

|                 |      |      |      |
|-----------------|------|------|------|
| CXCR4           | 3.61 |      |      |
| SLC16A6         | 3.58 |      |      |
| RNU1-28P        | 3.58 |      |      |
| RNU1-27P        | 3.58 |      |      |
| RNU1-1          | 3.58 |      |      |
| RNVU1-18        | 3.58 |      |      |
| RNU1-2          | 3.58 |      |      |
| RNU1-4          | 3.58 |      |      |
| RNU1-3          | 3.58 |      |      |
| RNVU1-29        | 3.58 |      |      |
| AC213203.2      | 3.58 |      |      |
| CRTC2           | 3.58 |      |      |
| RIT1            | 3.56 |      | 2.01 |
| ERRFI1          | 3.51 |      | 2.62 |
| HMGCS2          | 3.46 |      |      |
| TMEM92          | 3.43 |      |      |
| ITGA3           | 3.43 |      |      |
| FOXD1           | 3.39 |      |      |
| PRSS36          | 3.39 |      |      |
| KLF11           | 3.36 |      |      |
| UBASH3B         | 3.36 | 2.46 |      |
| EREG            | 3.34 |      |      |
| KCNG3           | 3.34 |      | 2.14 |
| MISP            | 3.34 | 2.69 |      |
| NAMPTP1         | 3.32 |      |      |
| PTPRS           | 3.32 |      |      |
| NUAK1           | 3.29 | 3.51 |      |
| HK2             | 3.27 |      |      |
| KDM7A           | 3.25 | 2.03 |      |
| HAMP            | 3.23 |      | 2.57 |
| PALLD           | 3.23 | 2.53 |      |
| VMAC            | 3.23 |      |      |
| CYP4F2          | 3.23 |      |      |
| AL035461.2      | 3.20 |      | 2.31 |
| MAGEH1          | 3.20 | 2.83 |      |
| CTC-429P9.3     | 3.20 |      |      |
| SGMS1-AS1       | 3.20 |      |      |
| GLP2R           | 3.18 |      |      |
| EPHA2           | 3.18 | 2.36 |      |
| KDM3A           | 3.16 |      |      |
| GPAM            | 3.16 |      |      |
| ENSG00000272153 | 3.16 |      |      |
| OSBP2           | 3.16 | 2.62 |      |
| SRGAP3          | 3.14 |      | 3.07 |
| PLCXD3          | 3.14 | 4.69 |      |

|              |      |      |      |
|--------------|------|------|------|
| SYBU         | 3.12 |      |      |
| AC004908.2   | 3.10 |      |      |
| ZF530        | 3.05 |      |      |
| HMGCS1       | 3.05 |      |      |
| AC026202.2   | 3.03 | 3.51 |      |
| DLX2         | 3.03 |      |      |
| COL2A1       | 2.99 | 2.22 |      |
| LINC01521    | 2.97 |      |      |
| RSRC2        | 2.97 |      |      |
| FAM47E-STBD1 | 2.97 |      |      |
| BAIAP2       | 2.95 |      |      |
| UGT2B10      | 2.95 | 2.83 |      |
| ZNF628       | 2.95 |      | 2.60 |
| RASD1        | 2.93 | 2    |      |
| TMEM151A     | 2.93 |      |      |
| MRVI1        | 2.91 |      |      |
| SNX22        | 2.89 |      |      |
| SEC14L5      | 2.87 |      |      |
| JUN          | 2.87 |      |      |
| LONRF3       | 2.87 |      |      |
| EID2B        | 2.83 |      |      |
| METRNL       | 2.83 | 2.55 |      |
| STK17A       | 2.83 |      |      |
| NR4A1        | 2.83 |      |      |
| DLX6-AS1     | 2.81 |      |      |
| CRYM         | 2.81 | 2.75 |      |
| ARL4C        | 2.81 |      |      |
| FAM160A1     | 2.81 |      |      |
| HECW2-AS1    | 2.81 |      |      |
| DOK1         | 2.79 | 2.87 |      |
| GRB10        | 2.79 | 2.25 |      |
| RAB20        | 2.79 |      |      |
| SLC2A3       | 2.79 |      |      |
| FRMD5        | 2.79 |      |      |
| JDP2         | 2.79 | 3.66 |      |
| ZNF649       | 2.77 |      |      |
| FGD6         | 2.73 | 2.39 |      |
| STBD1        | 2.73 |      |      |
| ASH1L-AS1    | 2.71 |      |      |
| TANC1        | 2.7  | 2.13 |      |
| AC012065.3   | 2.69 |      |      |
| SLC25A47     | 2.69 | 2.16 |      |
| TMEM147-AS1  | 2.69 |      |      |
| CSRNP1       | 2.69 |      |      |
| LNP1         | 2.68 |      |      |

|            |      |      |  |
|------------|------|------|--|
| LINC01023  | 2.68 |      |  |
| IL11       | 2.68 | 3.39 |  |
| GIHCG      | 2.66 |      |  |
| FERMT2     | 2.66 |      |  |
| TMCC1      | 2.66 |      |  |
| DIPK2A     | 2.64 |      |  |
| ADAM19     | 2.64 |      |  |
| FAM111B    | 2.62 |      |  |
| JUNB       | 2.62 |      |  |
| MXD1       | 2.62 | 2.17 |  |
| MYOF       | 2.62 |      |  |
| AL732292.2 | 2.60 |      |  |
| FBLIM1     | 2.60 | 2.14 |  |
| ELOVL6     | 2.58 |      |  |
| LYNX1      | 2.58 |      |  |
| AL139246.5 | 2.58 |      |  |
| FAM21FP    | 2.58 |      |  |
| AL592148.3 | 2.58 |      |  |
| ANKRD1     | 2.58 |      |  |
| AKR1B10    | 2.58 | 2.97 |  |
| DNAJB4     | 2.58 | 2.62 |  |
| SRSF5      | 2.57 |      |  |
| RFLNB      | 2.57 |      |  |
| AP000525.1 | 2.57 |      |  |
| IDI1       | 2.57 |      |  |
| NEDD9      | 2.57 |      |  |
| TENT4A     | 2.57 |      |  |
| TPSG1      | 2.57 |      |  |
| TAGLN      | 2.57 |      |  |
| SERTAD1    | 2.57 |      |  |
| ZNF37BP    | 2.55 |      |  |
| ZNF684     | 2.55 |      |  |
| CBX7       | 2.55 |      |  |
| INTS13     | 2.55 |      |  |
| CEBPD      | 2.55 |      |  |
| LOXL2      | 2.55 |      |  |
| AGR2       | 2.55 |      |  |
| FOXPS4-AS1 | 2.53 |      |  |
| ZNF441     | 2.53 | 3.41 |  |
| RPL5P11    | 2.53 |      |  |
| GDF15      | 2.53 | 2.04 |  |
| DGCR8      | 2.51 |      |  |
| SNAPC3     | 2.51 |      |  |
| SHLD2P1    | 2.50 |      |  |
| SOC5       | 2.50 | 2.07 |  |



|                 |      |      |      |
|-----------------|------|------|------|
| WWTR1           | 2.50 |      |      |
| DNAJB1          | 2.50 | 2.25 |      |
| AC018647.2      | 2.48 |      |      |
| IPMK            | 2.48 |      |      |
| FHL2            | 2.48 |      |      |
| AL161772.1      | 2.46 |      |      |
| LYSMD4          | 2.46 |      |      |
| MORN4           | 2.46 |      |      |
| BISPR           | 2.45 |      | 2.43 |
| PLEKHA2         | 2.45 |      |      |
| MEGF8           | 2.41 | 2.04 |      |
| LINC00957       | 2.41 |      |      |
| AC068888.1      | 2.41 |      |      |
| SAMD4A          | 2.41 |      |      |
| SAP30           | 2.41 |      |      |
| RLF             | 2.39 |      |      |
| DUSP8           | 2.39 |      |      |
| CD19            | 2.38 |      |      |
| PYCR3           | 2.38 |      |      |
| GRB7            | 2.38 |      |      |
| YEATS2          | 2.38 |      |      |
| RORA            | 2.38 |      |      |
| SV2A            | 2.36 |      |      |
| NAB2            | 2.36 |      |      |
| IL17RE          | 2.35 |      |      |
| GS1-358P8.4     | 2.35 |      |      |
| AC004812.2      | 2.35 |      |      |
| CHIC2           | 2.35 |      |      |
| WEE1            | 2.35 |      |      |
| LYPD3           | 2.33 |      |      |
| LINC01560       | 2.33 |      |      |
| RDH12           | 2.33 |      |      |
| EFNA3           | 2.33 |      |      |
| SPRY4           | 2.33 | 2.25 |      |
| AP001059.1      | 2.31 | 2.69 |      |
| LINC00997       | 2.31 |      |      |
| AC010442.1      | 2.31 |      |      |
| ACTG1           | 2.31 |      |      |
| SOS1            | 2.31 |      |      |
| ENSG00000160180 | 2.30 |      |      |
| AL356488.3      | 2.30 |      |      |
| PAWR            | 2.30 |      |      |
| NBEAL2          | 2.28 |      |      |
| FAM111A         | 2.28 |      |      |
| FOXA3           | 2.28 |      |      |

|               |      |      |      |
|---------------|------|------|------|
| MYL9          | 2.28 |      |      |
| CRABP2        | 2.28 |      |      |
| BEND3         | 2.27 |      |      |
| AL161729.1    | 2.27 |      |      |
| RSBN1         | 2.27 |      |      |
| FUT11         | 2.27 |      |      |
| LINC00667     | 2.25 |      |      |
| CCDC138       | 2.25 |      |      |
| RYBP          | 2.25 |      |      |
| ITPRIP        | 2.25 | 2.62 |      |
| GNB1L         | 2.25 |      |      |
| NKX2-5        | 2.25 |      |      |
| AC135050.6    | 2.23 |      |      |
| DUS2          | 2.23 |      |      |
| SALL2         | 2.23 |      |      |
| IL34          | 2.23 |      |      |
| HILPDA        | 2.23 |      | 2.36 |
| TRAF3IP2-AS1  | 2.23 |      |      |
| PPP3CC        | 2.23 |      |      |
| SNORD13       | 2.23 |      |      |
| AF127577.4    | 2.23 |      |      |
| GPCPD1        | 2.22 | 2.17 |      |
| RHEX          | 2.22 |      |      |
| CLK3          | 2.22 |      |      |
| NAMPT         | 2.22 |      |      |
| HIVEP2        | 2.22 |      |      |
| VGf           | 2.22 |      |      |
| THAP8         | 2.22 |      |      |
| PAOX          | 2.20 |      |      |
| GNA13         | 2.20 |      |      |
| PELI1         | 2.20 |      |      |
| FBXO9         | 2.19 |      |      |
| MSANTD3       | 2.19 |      |      |
| SP5           | 2.19 |      |      |
| INHBB         | 2.19 |      | 2.22 |
| PIM1          | 2.19 |      |      |
| JMJD6         | 2.19 |      |      |
| MAFK          | 2.19 |      |      |
| UCA1          | 2.19 |      |      |
| SLC38A11      | 2.17 |      |      |
| SIAH2         | 2.17 |      |      |
| ZYX           | 2.17 |      |      |
| STC2          | 2.17 |      |      |
| KDM4C         | 2.17 |      |      |
| RP11-504P24.8 | 2.17 |      |      |

|                |      |      |  |
|----------------|------|------|--|
| ILF3-DT        | 2.16 |      |  |
| ZNF654         | 2.16 |      |  |
| PSMB9          | 2.16 |      |  |
| JAG1           | 2.16 |      |  |
| STK26          | 2.16 | 2.08 |  |
| ZNF100         | 2.14 | 2.51 |  |
| AL161421.1     | 2.14 |      |  |
| TCF12          | 2.14 |      |  |
| GCLC           | 2.14 |      |  |
| BTBD11         | 2.14 |      |  |
| EGLN1          | 2.14 |      |  |
| RP11-517P14.2  | 2.13 |      |  |
| AL109918.1     | 2.13 |      |  |
| CAMSAP3        | 2.13 |      |  |
| DCBLD2         | 2.13 |      |  |
| PLK2           | 2.13 |      |  |
| MTCL1          | 2.13 |      |  |
| ZNF556         | 2.11 |      |  |
| HHEX           | 2.11 |      |  |
| UBALD1         | 2.11 |      |  |
| WTIP           | 2.11 |      |  |
| SERPINE1       | 2.11 |      |  |
| FAM98A         | 2.10 |      |  |
| AMER1          | 2.10 |      |  |
| HSD11B2        | 2.10 |      |  |
| U91328.19      | 2.10 |      |  |
| FDPS           | 2.10 |      |  |
| EAF1           | 2.10 |      |  |
| SERTAD2        | 2.10 |      |  |
| THAP1          | 2.10 |      |  |
| DEPP1          | 2.08 |      |  |
| TIGD3          | 2.08 |      |  |
| ACSM5          | 2.08 |      |  |
| NR5A2          | 2.08 |      |  |
| FAM217B        | 2.07 |      |  |
| AL035071.1     | 2.07 |      |  |
| LINC00526      | 2.07 |      |  |
| BRI3BP         | 2.07 | 2.04 |  |
| SMIM19         | 2.07 |      |  |
| ZNF213-AS1     | 2.07 |      |  |
| RP11-1275H24.3 | 2.07 |      |  |
| SLC25A36       | 2.07 |      |  |
| TMEM51         | 2.07 |      |  |
| OSBPL10        | 2.07 |      |  |
| HUS1           | 2.07 |      |  |

|             |      |      |      |
|-------------|------|------|------|
| OSGIN1      | 2.07 |      |      |
| MT-CYB      | 2.06 |      |      |
| GDPD1       | 2.06 |      |      |
| PWAR6       | 2.06 |      |      |
| HPCAL1      | 2.06 |      |      |
| RHPN2       | 2.06 |      |      |
| PROSER2     | 2.06 |      |      |
| PIM3        | 2.06 |      |      |
| SEC24B      | 2.06 |      |      |
| CPEB4       | 2.06 |      |      |
| AC012321.1  | 2.06 |      |      |
| DNAJB9      | 2.06 | 2.19 |      |
| OXLD1       | 2.04 |      |      |
| SRSF6       | 2.04 |      |      |
| AC132872.1  | 2.04 | 2.01 |      |
| NBPF14      | 2.04 |      |      |
| SIRT1       | 2.04 |      |      |
| SH3RF1      | 2.04 |      |      |
| NFIL3       | 2.04 |      |      |
| FBXO42      | 2.04 |      |      |
| PXK         | 2.04 |      |      |
| FBX08       | 2.04 |      |      |
| PRDM10      | 2.04 |      |      |
| ACACA       | 2.03 |      |      |
| AC012123.1  | 2.03 |      |      |
| SEC24A      | 2.03 |      |      |
| BCL10       | 2.03 |      |      |
| MAPK7       | 2.03 |      |      |
| PIGW        | 2.01 |      |      |
| CNTD2       | 2.01 |      |      |
| AL845472.2  | 2.01 |      |      |
| AREG        | 2.01 |      |      |
| CNOT8       | 2.01 |      |      |
| ANGPTL4     | 2.01 |      | 3.41 |
| MXI1        | 2.01 |      |      |
| NUDT3       | 2    |      |      |
| PXMP2       | 2    |      |      |
| ELMOD2      | 2    |      |      |
| ZNF331      | 2    |      |      |
| GPLD1       | 2    |      |      |
| SMOX        | 2    |      |      |
| PDK1        | 2    |      |      |
| ERF         | 2    |      |      |
| STX3        | 2    |      |      |
| ARPIN-AP3S2 | 2    |      |      |

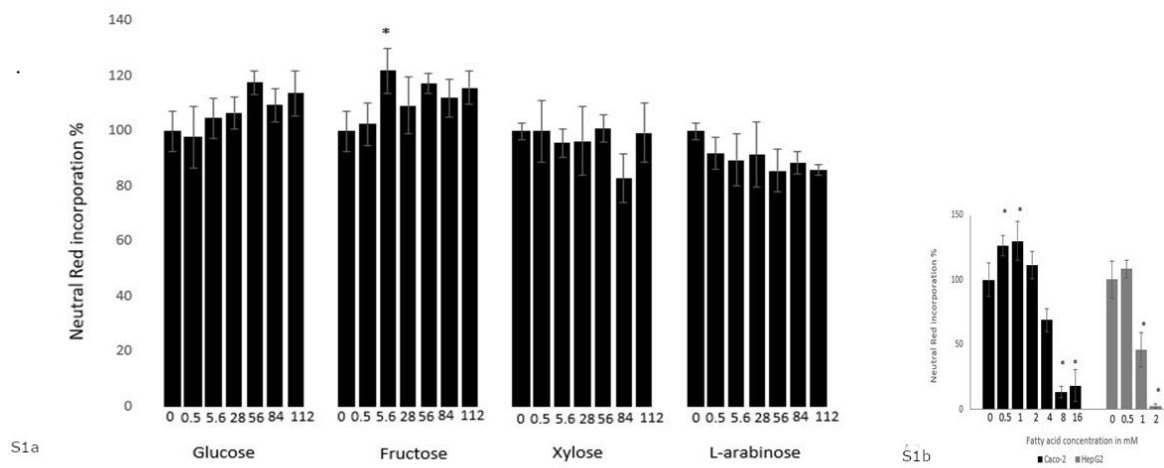

Figure S1.

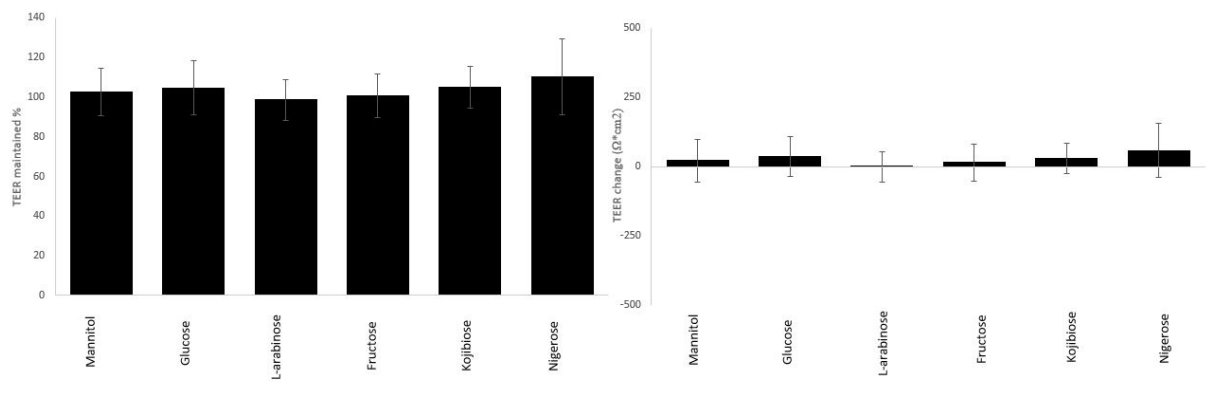

Figure S2.

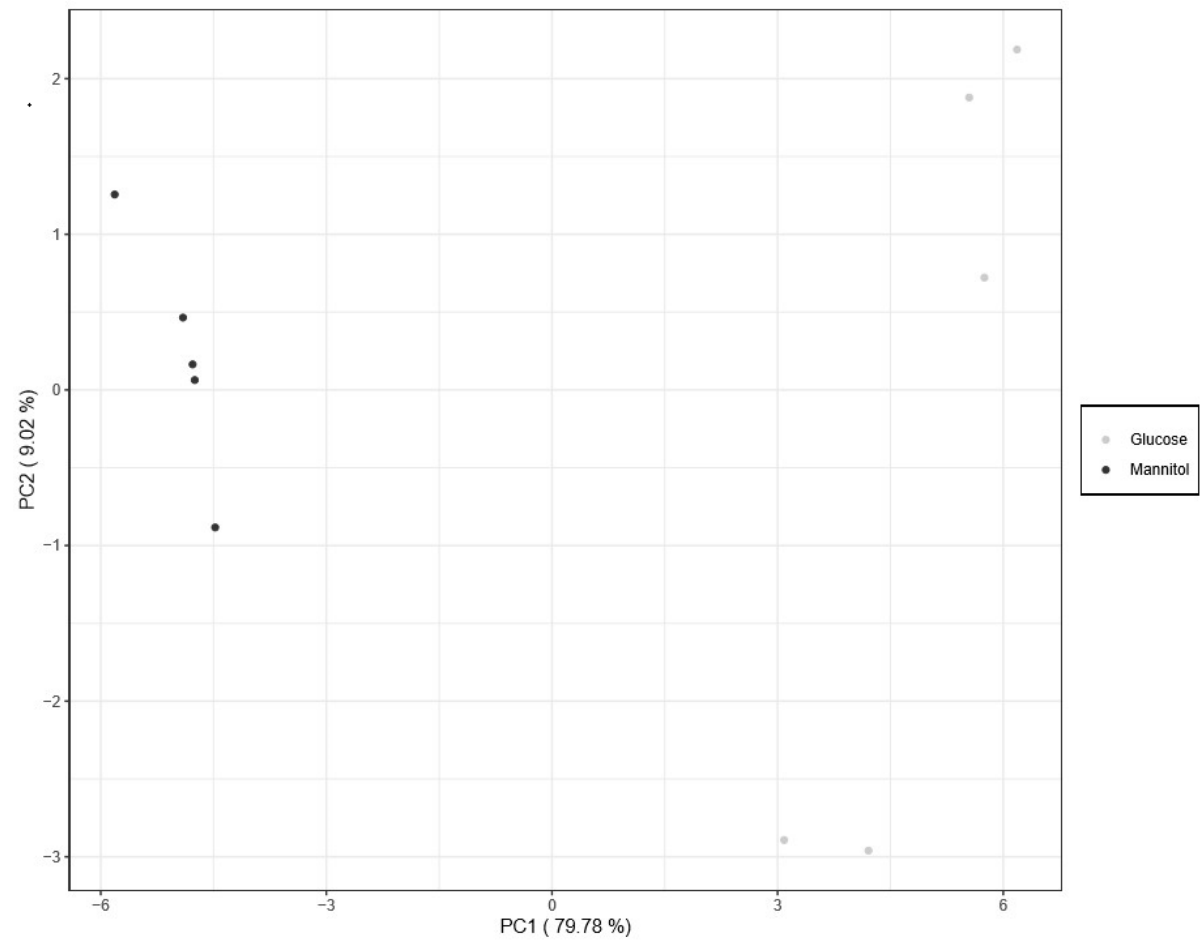

Figure S3a.

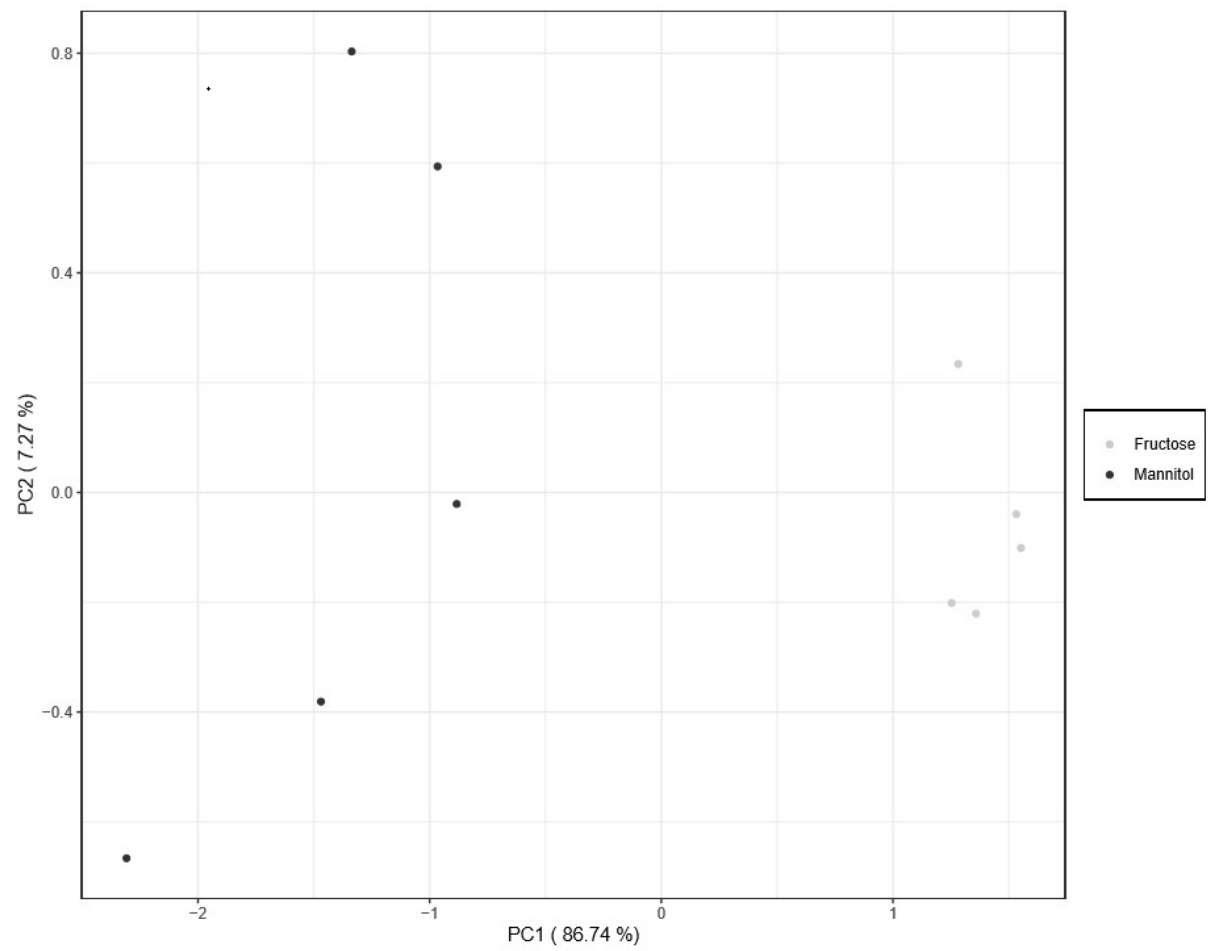

Figure S3b.

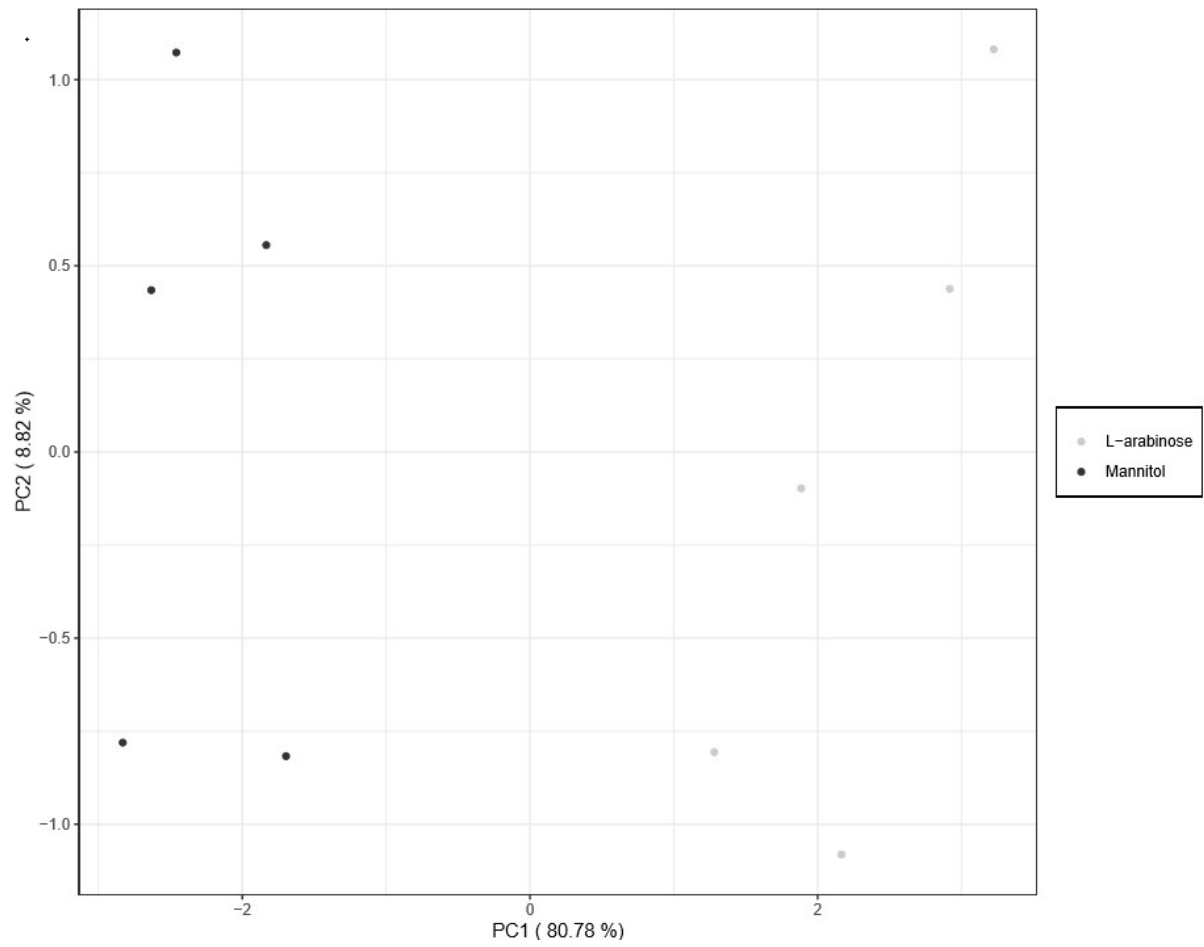

Figure S3c.



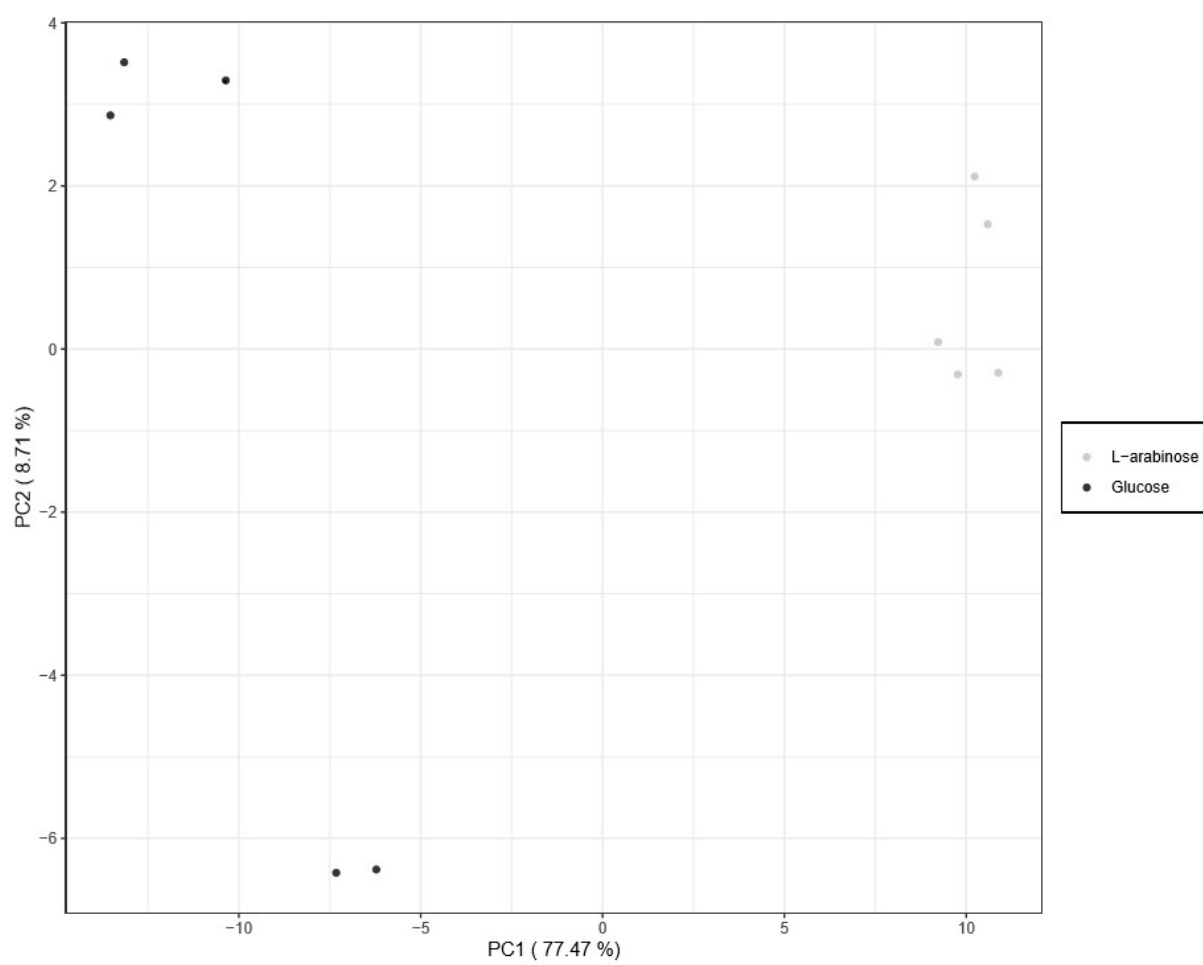

Figure S3d.
